# Supplementary material
Source: ML conference proceedings conference paper supplement (https://proceedings.mlr.press/v80/kumar18a.html)
Supplement: Supplementary file [file kumar18a-supp.pdf]

# Supplementary Material for Trainable Calibration Measures for Neural Networks from Kernel Mean Embeddings

Aviral Kumar<sup>1</sup> Sunita Sarawagi<sup>1</sup> Ujjwal Jain<sup>1</sup>

## 1. Proof of Theorem 2

*Proof.* Our proof technique is similar to (Gretton et al., 2012)’s for MMD. Define  $g(D) = |\text{MMCE}_m(D) - \text{MMCE}(P)|$ . The maximum change in  $g(D)$  when one sample  $(r_i, c_i)$  is replaced by a random other sample is  $\frac{2\sqrt{K}}{m}$  in the expression for  $\text{MMCE}_m$ . Applying McDiarmid inequality, we get that

$$\Pr(g(D) - E_D[g(D)] > \epsilon) < \exp\left(-\frac{m\epsilon^2}{2K}\right) \quad (1)$$

Next we upper bound  $E_D[g(D)]$  starting from the definition of MMCE.

$$\begin{aligned} & E_D[|\text{MMCE}_m(D) - \text{MMCE}(P)|] \\ &= E_D\left[\left|\sup_{f \in \mathcal{F}} \left[\sum_{i=1}^m \frac{(c_i - r_i)f(r_i)}{m}\right] - \sup_{f \in \mathcal{F}} E_P[(c - r)f(r)]\right|\right] \\ &\leq E_D \sup_f \left| \sum_{i=1}^m \frac{(c_i - r_i)f(r_i)}{m} - E_P[(c - r)f(r)] \right| \\ &= E_D \sup_f \left| \sum_{i=1}^m \frac{(c_i - r_i)f(r_i)}{m} - E_{D'}\left[\sum_{i=1}^m \frac{(c'_i - r'_i)f(r'_i)}{m}\right] \right| \\ &\leq E_{D, D'} \sup_f \left| \sum_{i=1}^m \frac{(c_i - r_i)f(r_i)}{m} - \sum_{i=1}^m \frac{(c'_i - r'_i)f(r'_i)}{m} \right| \\ &= E_{D, D', \sigma} \sup_f \left| \sum_{i=1}^m \sigma_i \left( \frac{(c_i - r_i)f(r_i)}{m} - \frac{(c'_i - r'_i)f(r'_i)}{m} \right) \right| \\ &\leq 2\sqrt{\frac{4K}{m}} \end{aligned}$$

In the above  $\sigma_i$  denotes random variables that can take values +1 or -1 with equal probability and the last inequality is due to (Bartlett & Mendelson, 2002), Lemma 22. Combining Equation 1 and the above we get that  $\Pr(g(D) > 4\sqrt{\frac{K}{m}} + \epsilon) < \exp(-\frac{m\epsilon^2}{2K})$  Rearranging terms and substituting  $\delta$  on the RHS proves the inequality.  $\square$

<sup>1</sup>Department of Computer Science and Engineering, IIT Bombay, Mumbai, India. Correspondence to: Aviral Kumar <aviralkumar2907@gmail.com>.

| Dataset   | Model      | Improvement |        |
|-----------|------------|-------------|--------|
|           |            | Accuracy    | ECE    |
| MNIST     | LeNet 5    | +0.02%      | -0.30% |
| CIFAR 10  | Resnet 50  | -0.02%      | -2.05% |
| CIFAR 10  | Resnet 110 | +0.01%      | -2.50% |
| CIFAR 100 | Resnet 32  | +1.20%      | -2.58% |

Table 1. The change in ECE and accuracy compared to Baseline when fine-tuning a pre-trained model using MMCE.

## 2. Proof of Theorem 3

*Proof.* Starting from the RHS,  
 $ECE(P(r, c)) = \mathbb{E}_r \left[ \left| r - \frac{p(c=1, r)}{p(r)} \right| \right]$   
 $= \mathbb{E}_r \left[ \left| \frac{r \cdot p(c=0, r) - (1-r) \cdot p(c=1, r)}{p(r)} \right| \right]$   
 $= \int_r |r \cdot p(c=0, r) - (1-r) \cdot p(c=1, r)| dr$

Now, we can rewrite

$$\begin{aligned} \text{MMCE}(P(r, c)) &= \sup_{f \in \mathcal{F}} \sum_c \int_r (c - r) \cdot f(r) dP(r, c) \\ &= \int_r ((1-r) \cdot p(c=1, r) - r \cdot p(c=0, r)) \cdot f(r) dr \end{aligned}$$

It is easy to see that  $M(\mathcal{D}_L, P(r, c)) = ECE(P(r, c))$  where  $\mathcal{D}_L = \{f \mid \|f\|_\infty \leq L\}$ . We pick  $f(r) = L \cdot \text{sign}((1-r) \cdot p(c=1, r) - r \cdot p(c=0, r))$ . Note that the set  $\mathcal{D}_L$  also includes discontinuous functions. In contrast  $\text{MMCE}(P) = M(\mathcal{F}_K, P)$  where  $\mathcal{F}_K$  is the space of continuous functions in RKHS with maximum kernel value limited to  $K$ .  $\mathcal{F}_K$  is included in  $\mathcal{D}_L$  when  $L \geq \sqrt{K}$ . This proves our required result.  $\square$

## 3. Finetuning using MMCE

Table 1 shows the ECE and Accuracy numbers for some models when MMCE is used to finetune them, post-training.

## 4. Comparison of Running times

Table 2 summarizes the running time per epoch for training using MMCE+NLL and NLL objectives. MMCE, on an

average, doesn't create an overhead of more than 10% over the baseline.

| Dataset       | Model           | Baseline | MMCE   |
|---------------|-----------------|----------|--------|
| CIFAR 10      | Resnet 50       | 4.6s     | 4.7s   |
| CIFAR 10      | Resnet 110      | 10.5s    | 11.1s  |
| CIFAR 100     | W. Resnet 28-10 | 48.0s    | 55.0s  |
| CIFAR 100     | Resnet 32       | 11.5s    | 11.5s  |
| 20 Newsgroups | Global Pool     | 5.7s     | 6.0s   |
| IMDB Reviews  | HAN             | 226.0s   | 227.0s |
| UCI HAR       | LSTM            | 0.6s     | 0.7s   |

Table 2. Running time per epoch in seconds for Baseline and MMCE methods for different models and datasets

## References

- Bartlett, P. L. and Mendelson, S. Rademacher and gaussian complexities: Risk bounds and structural results. *Journal of Machine Learning Research*, 3:463–482, 2002.
- Gretton, A., Borgwardt, K. M., Rasch, M. J., Schölkopf, B., and Smola, A. J. A kernel two-sample test. *Journal of Machine Learning Research*, 13:723–773, 2012.
